# Supplementary material for: Higher Prevalence of “Low T3 Syndrome” in Patients With Chronic Fatigue Syndrome: A Case–Control Study
Source: Front Endocrinol (Lausanne). 2018 Mar 20;9:97. doi: 10.3389/fendo.2018.00097 (PMC5869352; doi:10.3389/fendo.2018.00097)
Supplement: Supplementary file 2 [file table_2.xlsx]

## Sheet: suppl table 2
	Supplemental Table 2. Anthropometrics and laboratory data of 77 CFS patients and 82 controls (selected CFS and control subgroups 2).
			CFS Patients	Controls			CFS Patients		Controls
		Units	Median (range)	Median (range)	p value	Reference range/cut-off value	% (n) below	% (n) above	% (n) below	% (n) above
	Anthropometrics
	Number		77	82
	Gender	male/female	18/59	22/60
	Age	years	44 (21 - 69)	38 (19 - 64)	0.18
	Height	cm	172 (156 - 198)	173 (155 - 193)	0.81
	Weight	kg	65 (48 - 103)	67 (48 - 100)	0.368
	BMI	kg/m2	22 (18 - 30)	22 (18 - 29)	0.304
	Thyroid function
	TSH	mU/L	1.41 (0.62 - 4.40)	1.63 (0.53 - 3.17)	0.399	0.5 - 4	0 (0)	1 (1)	0 (0)	0 (0)
	FT4	pmol/L	15.8 (11.4 - 23.0)	15.7 (11.0 - 19.7)	0.699	11.0 - 19.5	0 (0)	6 (5)	0 (0)	1 (1)
	FT3	pmol/L	5.1 (3.9 - 6.9)	5.3 (3.2 - 12.8)	0.062	4.4 - 6.7	21 (16)	3 (2)	9 (7)	17 (14)
	TT4	nmol/L	59.9 (17.8 - 121.3)	71.0 (45.4 - 134.8)	< 0.001 **
	TT3	nmol/L	1.3 (0.4 - 2.2)	1.6 (1.2 -2.3)	< 0.001 **
	rT3	nmol/L	0.22 (0.08 - 0.40)	0.23 (0.12 - 0.35)	0.542	0.11 - 0.44	1 (1)	0 (0)	0 (0)	0 (0)
	% TT4		97.54 (96.69 - 98.44)	97.54 (96.61 - 98.47)	0.643
	% TT3		2.06 (1.21 - 2.94)	2.15 (1.24- 3.12)	0.021 *
	% rT3		0.35 (0.12 - 1.14)	0.30 (0.15 - 0.45)	< 0.001 **
	TT3/FT4 ratio	mol/mol	84.83 (28.37 - 149.12)	101.19 (65.99 - 162.79)	< 0.001 **
	FT3/FT4 ratio	mol/mol	0.32 (0.20 - 0.49)	0.34 (0.24 - 0.74)	0.009 *
	rT3/TT3 ratio	mol/mol	0.18 (0.05 - 0.52)	0.15 (0.08 - 0.23)	< 0.001 **
	TT3/FT3 ratio	mol/mmol	0.27 (0.08 -0.36)	0.31 (0.14 - 0.45)	< 0.001 **
	TT4/FT4 ratio	mol/mmol	3.94 (1.26 - 6.59)	4.58 (3.15 - 9.05)	< 0.001 **
	SPINA-GT	pmol/s	1.60 (0.36 - 4.36)	2.01 (1.07 - 6.43)	0.011 *
	SPINA-GD	nmol/s	13.05 (4.36 - 22.94)	15.57 (10.15 - 25.05)	< 0.001 **
	sTSHi		- 1.91 (-3.08 - 2.51)	-1.58 (-3.21 - 0.70)	0.399
	Anti TPO	IU/mL	0 (0 - 605)	0 (0 - 107)	0.155	0 - 35	-	8 (6)	-	4 (3)
	Anti TG	IU/mL	0 (0 - 2320)	0 (0 - 23)	0.08	0 - 34	-	5 (4)	-	0 (0)
	Inflammation
	WBC	109/L	6.0 (3.3 - 10.0)	6.0 (3.7- 9.5)	0.16	4 - 10	6 (5)	-	4 (3)	-
	hsCRP	mg/L	0.69 (0.09 - 2.74)	0.61 (0.11 - 2.85)	0.258	< 5.0	-	-	-	-
	Kynurenine	µmol/L	1.65 (0.79 - 2.97)	1.79 (1.05 - 3.03)	0.011 *	1.14 - 3.02	12 (9)	0 (0)	2 (2)	1 (1)
	Tryptophan	µmol/L	55.8 (27.9 - 88.7)	56.4 (43.9 - 90.2)	0.033 *	45 - 83	16 (12)	1 (1)	1 (1)	1 (1)
	Tryptophan/Kynurenine	mol/mol	32.53 (19.75 - 63.78)	32.26 (17.43 - 56.92)	0.622
	Ferritin 1	µg/L	75 (8 - 400)	54 (5 - 386)	0.056	Men 30 - 400	1 (1)	0 (0)	0 (0)	0 (0)
						Women 15-130	1 (1)	8 (6)	10 (8)	10 (8)
	Urinary isoprostanes	nmol/d	1246 (164 - 6830)	1336 (170 - 9978)	0.419
	RBC	1012/L	4.5 (3.7 - 5.6)	4.6 (3.8 - 5.8)		Men 4.6 - 6.2	1 (1)	0 (0)	5 (4)	0 (0)
						Women 4.2 - 5.4	9 (7)	0 (0)	12 (10)	0
	Hemoglobin	mmol/L	8.5 (7.1 - 10.9)	8.6 (7.2 - 11.1)		Men 8.7 - 10.6	0 (0)	1 (1)	4 (3)	2 (2)
						Women 7.5 - 9.9	4 (3)	0 (0)	5 (4)	0 (0)
	Hematocrit	L/L	0.40 (0.34 - 0.49)	0.41 (0.34- 0.51)		Men 0.42 - 0.52	1 (1)	0 (0)	4 (3)	0 (0)
						Women 0.37 - 0.47	6 (5)	0 (0)	9 (7)	0 (0)
	Thrombocytes	109/L	243 (129 - 391)	247 (164 - 491)		150 - 350	1 (1)	3 (2)	0 (0)	2 (2)
	Serum lipids
	TC	mmol/L	5.2 (2.8 - 7.6)	5.0 (3.0 - 7.9)	0.97
	HDL-C 2	mmol/L	1.5 (0.6 - 3.9)	1.7 (0.7 - 3.2)	0.009 *
	LDL-C	mmol/L	3.0 (1.1 - 5.6)	3.1 (1.1 - 5.9)	0.908
	TC/HDL-C 2	mol/mol	3.3 (1.7 - 10.7)	3.0 (1.7 - 9.0)	0.012 *
	Vitamins
	Folate	pmol/L	20.0 (5.5 - 50.0)	20.0 (8.7 - 50.0)		4 - 30	0 (0)	19 (15)	0 (0)	12 (10)
	Vitamin B12	pmol/L	376 (111 - 1500)	286 (78 - 730)	0.001	145 - 450	6 (5)	40 (31)	4 (3)	11 (9)
	Methylmalonic Acid	nmol/L	155.6 (67.9 - 371.8)	183.3 (81.9 - 1838.2)	0.041	90 - 340	4 (3)	5 (4)	1 (1)	7 (6)
	Homocysteine	µmol/L	8.13 (3.79 - 37.11)	9.00 (2.57 - 19.03)		< 10	-	26 (20)	-	30 (25)
	DNL Liver	g%	34.88 (32.37 - 39.22)	36.31 (33.58 - 43.85)	< 0.001 **
	Intestinal permeability
	Zonulin	ng/mL	1.25 (0.17 - 2.05)	1.36 (0.25 - 2.89)	0.014 *
	Nutritional factors
	Urinary Iodine (24 h)	µg/d	113 (30 - 559)	158 (27 - 666)	0.001 **	> 200	96 (74)	3 (2)	66 (54)	23 (19)
	Magnesium (P)	mg/L	20.0 (14.7 - 24.0)	20.2 (16.5 - 24.3)		19.0 - 24.0	16 (12)	0 (0)	31 (25)	1 (1)
	Zinc (P)	mg/L	0.9 (0.6 - 1.4)	1.0 (0.7 - 1.2)	< 0.001	0.8 - 1.4	9 (7)	0 (0)	1 (1)	0 (0)
	Copper (P)	mg/L	1.0 (0.4 - 2.0)	1.1 (0.6 - 2.1)		0.7 - 1.4	4 (3)	12 (9)	5 (4)	11 (9)
	Selenium (P)	mg/L	0.08 (0.05 - 0.18)	0.09 (0.06 - 0.13)	0.16	0.08 - 0.30	42 (32)	0 (0)	32 (26)	0 (0)
	Magnesium (IC)	mg/L	57.9 (45.8 - 75.4)	56.8 (40.5 - 66.6)	0.04	52.0 - 80.0	13 (10)	0 (0)	16 (13)	0 (0)
	Zinc (IC)	mg/L	14.9 (10.0 - 20.0)	13.7 (8.0 - 20.0)	< 0.001	10.5 - 13.7	1 (1)	77 (59)	5 (4)	46 (38)
	Copper (IC)	mg/L	0.6 (0.0 - 0.7)	0.6 (0.0 - 1.0)		0.7 - 1.3	80 (62)	0 (0)	72 (59)	0 (0)
	Selenium (IC)	mg/L	0.17 (0.11 - 0.63)	0.15 (0.10 - 0.31)	0.009 *	0.17 - 0.55	47 (36)	1 (1)	60 (49)	0 (0)
	Zinc/Copper (IC)	g/g	24.8 (17.3 - 49.3)	21.8 (10.9 - 42.8)	< 0.001
	Zinc/Copper (P)	g/g	0.8 (0.4- 2.3)	0.9 (0.4 - 2.0)
	25 (OH) Vitamin D	nmol/L	73.7 (16.0 - 217.2)	56.25 (5.4 - 133.4)	< 0.001 **	80 - 250	60 (46)	0 (0)	84 (69)	0 (0)
	Iron (S)	µmol/L	19 (8 - 46)	20 (7 - 34)		10 - 30	3 (2)	5 (4)	4 (3)	5 (4)
						Women 15-130	1 (1)	8 (6)	10 (8)	10 (8)
	Intestinal permeability
	RBC Fatty acids (g%)
	14:0	g%	0.32 (0.16 - 0.89)	0.35 (0.20 - 0.82)	< 0.001
	16:0	g%	21.03 (17.74 - 25.67)	22.20 (20.14 - 28.70)	< 0.001
	18:0	g%	17.23 (14.93 - 19.53)	17.15 (15.24 - 24.46)
	20:0	g%	0.45 (0.32 - 0.58)	0.45 (0.33 - 0.68)
	SFA	g%	45.90 (42.79 - 49.73)	46.14 (41.84 - 55.04)
	OA	g%	12.13 (10.34 - 15.74)	12.35 (10.87 - 14.67)	0.035
	MUFA	g%	19.29 (15.17 - 25.02)	18.42 (13.09 - 21.17)	< 0.001
	LA	g%	9.01 (6.04 - 12.04)	9.50 (7.45 - 11.73)	0.007
	GLA	g%	0.04 (0.00 - 0.14)	0.04 (0.02 - 0.17)
	AA	g%	14.12 (9.64 - 16.31)	14.02 (10.17 - 17.84)
	ALA	g%	0.16 (0.08 - 0.67)	0.17 (0.11 - 0.46)
	EPA	g%	0.47 (0.12 - 1.69)	0.54 (0.17 - 2.09)
	DHA	g%	3.46 (1.65 - 6.46)	3.65 (1.74 - 6.86)
	RBC-EPA+DHA	g%	4.03 (1.95 - 7.81)	4.15 (1.91 - 8.54)	0.448	> 8	100 (77)	0 (0)	98 (80)	2 (2)
	PUFA	g%	34.92 (29.71 - 39.92)	35.07 (25.96 - 43.73)
	RBC EPA/AA	g%	0.03 (0.01 - 0.17)	0.04 (0.01 - 0.18)	0.22
	Data are medians (ranges). Mann-Whitney U tests were used for between-group differences. Selected subgroup 2 was created by excluding 21 CFS patients and 17 controls with hsCRP >3 mg/L and/or BMI >30 kg/m2 and/or WBC >10*109/L.
	1 When analyzed according to gender, ferritin was higher in both male and female CFS patients as compared to controls (data not shown).
	2 When the TC/HDL-C ratio and HDL-C were evaluated according to gender, we did not find differences in the TC/HDL-C ratio nor HDL-C in the relatively small number of men, but those in the females persisted (data not shown).
	* Significant at p < 0.05. ** Significant at p < 0.01
	Abbreviations: WBC, white blood cells; RBC, red blood cells; hsCRP, high-sensitive C-reactive protein; P, plasma; IC, intracellular; TSH, thyrotropin; FT4, free thyroxin; FT3, free triiodothyronine; TT4, total thyroxin; TT3, total triiodothyronine; rT3, reverse T3; TC, total cholesterol; LDL-C, low-density lipoprotein-cholesterol; HDL-C, high-density lipoprotein-cholesterol; SPINA-GD, sum activit…
